# Supplementary material
Source: Research Square preprint supplement (doi:10.21203/rs.3.rs-9051294/v1)
Supplement: Supplementary file 1 [file 8b1601429f3199871b029fa3.docx]

**Additional file 2. Survey questionnaire (English)**

Section 1: Demographic characteristics

Age: ( ) 25 years or younger ( ) 26–35 years ( ) 36–45 years ( ) 46–55 years ( ) Above 55 years

Gender: ( ) Male ( ) Female

Professional status: ( ) Consultant ( ) Specialist ( ) Resident ( ) General practitioner

Years of clinical experience: ( ) Less than 1 year ( ) 1–5 years ( ) 6–10 years ( ) More than 10 years

Specialty: ( ) Internal medicine ( ) Family medicine ( ) General practice ( ) Cardiology ( ) Nephrology ( ) Endocrinology ( ) Other: ______

Section 2: Knowledge toward the use of SGLT-2 inhibitors

1) What is the prevalence of type 2 diabetes mellitus in the Northwest Bank?

( ) <20% ( ) 21–40% ( ) 41–60% ( ) >60% ( ) I do not know

2) Sodium–glucose co-transporter-2 (SGLT2) inhibitors can be used as a first-line drug in type 2 diabetes.

( ) Strongly agree ( ) Agree ( ) Neutral ( ) Disagree ( ) Strongly disagree

3) Patients with type 2 diabetes and evidence of diabetic kidney disease should receive SGLT2 inhibitors if not contraindicated (e.g., eGFR >30, albuminuria).

( ) Strongly agree ( ) Agree ( ) Neutral ( ) Disagree ( ) Strongly disagree

4) SGLT2 inhibitors should not be prescribed for patients with eGFR <30 mL/min/1.73m².

( ) Strongly agree ( ) Agree ( ) Neutral ( ) Disagree ( ) Strongly disagree

Section 3: Attitude toward the use of SGLT-2 inhibitors

For each statement below, please select the option that best reflects your opinion:

1) I have been adequately trained in the appropriate anti-diabetic medication selection in routine patient care.

( ) Strongly agree ( ) Agree ( ) Neutral ( ) Disagree ( ) Strongly disagree

2) I am aware of appropriate anti-diabetic medication selection in routine patient care.

( ) Strongly agree ( ) Agree ( ) Neutral ( ) Disagree ( ) Strongly disagree

3) I am aware of which anti-diabetic medications are associated with better morbidity and mortality profile among patients with type 2 diabetes mellitus.

( ) Strongly agree ( ) Agree ( ) Neutral ( ) Disagree ( ) Strongly disagree

4) I feel comfortable prescribing SGLT2 inhibitors as anti-diabetic medication.

( ) Strongly agree ( ) Agree ( ) Neutral ( ) Disagree ( ) Strongly disagree

Section 4: Perceived barriers to prescribing SGLT-2 inhibitors

For each item below, select one option:

Lack of knowledge about the drug

( ) Strongly agree ( ) Agree ( ) Neutral ( ) Disagree ( ) Strongly disagree

Drug’s low efficacy

( ) Strongly agree ( ) Agree ( ) Neutral ( ) Disagree ( ) Strongly disagree

Drug’s low safety

( ) Strongly agree ( ) Agree ( ) Neutral ( ) Disagree ( ) Strongly disagree

Side effects

( ) Strongly agree ( ) Agree ( ) Neutral ( ) Disagree ( ) Strongly disagree

Cost

( ) Strongly agree ( ) Agree ( ) Neutral ( ) Disagree ( ) Strongly disagree

Drug–drug interactions

( ) Strongly agree ( ) Agree ( ) Neutral ( ) Disagree ( ) Strongly disagree

Presence of alternative anti-diabetic medications

( ) Strongly agree ( ) Agree ( ) Neutral ( ) Disagree ( ) Strongly disagree

Section 5: Factors influencing the decision to prescribe SGLT-2 inhibitors

For each factor below, select one option:

Patient’s clinical condition

( ) Strongly agree ( ) Agree ( ) Neutral ( ) Disagree ( ) Strongly disagree

Patient preference/refusal

( ) Strongly agree ( ) Agree ( ) Neutral ( ) Disagree ( ) Strongly disagree

Clinical inertia (waiting to see this drug class become more popular)

( ) Strongly agree ( ) Agree ( ) Neutral ( ) Disagree ( ) Strongly disagree

Senior/consultant preference

( ) Strongly agree ( ) Agree ( ) Neutral ( ) Disagree ( ) Strongly disagree
