# Supplementary material
Source: Research Square preprint supplement (doi:10.21203/rs.3.rs-9051294/v1)
Supplement: Supplementary file 2 [file f81c173cbbd0c60616483ef4.docx]

STROBE checklist (cross-sectional studies)

Manuscript: Primary care and hospital physicians’ knowledge, attitudes, and perceived barriers to prescribing SGLT2 inhibitors in the Northwest Bank of Palestine: a cross-sectional survey

This checklist indicates where each STROBE item is addressed in the manuscript. Page numbers refer to the rendered submission PDF.

| **Section/Topic** | **Item No.** | **Checklist item** | **Location in manuscript (page)** |
| --- | --- | --- | --- |
| Title and abstract | 1a | Indicate the study’s design with a commonly used term in the title or the abstract. | Title/Abstract (p.1) |
| Title and abstract | 1b | Provide in the abstract an informative and balanced summary of what was done and what was found. | Abstract (p.1) |
| Introduction | 2 | Explain the scientific background and rationale for the investigation being reported. | Background (p.2) |
| Introduction | 3 | State specific objectives, including any prespecified hypotheses. | Background (p.2) |
| Methods | 4 | Present key elements of study design early in the paper. | Methods (p.2) |
| Methods | 5 | Describe the setting, locations, and relevant dates, including periods of recruitment, exposure, follow-up, and data collection. | Methods (p.2) |
| Methods | 6a | Give the eligibility criteria, and the sources and methods of selection of participants. | Methods (p.2) |
| Methods | 6b | For matched studies, give matching criteria and number of exposed and unexposed. | Not applicable (cross-sectional; no matching) |
| Methods | 7 | Clearly define all outcomes, exposures, predictors, potential confounders, and effect modifiers. Give diagnostic criteria, if applicable. | Survey instrument and scoring; Statistical analysis (pp.2–3) |
| Methods | 8 | For each variable of interest, give sources of data and details of methods of assessment (measurement). Describe comparability of assessment methods if there is more than one group. | Survey instrument and scoring (p.2) |
| Methods | 9 | Describe any efforts to address potential sources of bias. | Methods (pp.2–3); discussed in Strengths and limitations (p.13) |
| Methods | 10 | Explain how the study size was arrived at. | Methods (p.2) |
| Methods | 11 | Explain how quantitative variables were handled in the analyses. If applicable, describe which groupings were chosen and why. | Survey instrument and scoring; Knowledge/Attitude results (pp.2, 5–6) |
| Methods | 12a | Describe all statistical methods, including those used to control for confounding. | Statistical analysis (p.3); Table 6 (pp.10–12) |
| Methods | 12b | Describe any methods used to examine subgroups and interactions. | Statistical analysis; post-hoc tests (pp.3, 10–12) |
| Methods | 12c | Explain how missing data were addressed. | Statistical analysis (p.3); Attitude section (p.6) |
| Methods | 12d | If applicable, describe analytical methods taking account of sampling strategy. | Methods: convenience sampling; no weighting (p.2) |
| Methods | 12e | Describe any sensitivity analyses. | Statistical analysis (p.3) |
| Results | 13a | Report numbers of individuals at each stage of study—e.g., numbers potentially eligible, examined for eligibility, confirmed eligible, included in the study, completing follow-up, and analysed. | Results (p.3) |
| Results | 13b | Give reasons for non-participation at each stage. | Methods: participant recruitment (p.2) |
| Results | 13c | Consider use of a flow diagram. | Methods/Results (pp.2–3) |
| Results | 14a | Give characteristics of study participants (e.g., demographic, clinical, social) and information on exposures and potential confounders. | Table 1; Figure 1 (pp.3–4) |
| Results | 14b | Indicate number of participants with missing data for each variable of interest. | Statistical analysis (p.3); Attitude complete cases (p.6) |
| Results | 14c | Summarise follow-up time (e.g., average and total amount). | Not applicable (cross-sectional; no follow-up) |
| Results | 15 | Report numbers of outcome events or summary measures. | Knowledge and Attitude results; Tables 2–3; Figures 2–3 (pp.5–8) |
| Results | 16a | Give unadjusted estimates and, if applicable, confounder-adjusted estimates and their precision (e.g., 95% CI). Make clear which confounders were adjusted for and why they were included. | Group comparisons and p-values; Table 6 (pp.10–12) |
| Results | 16b | Report category boundaries when continuous variables were categorized. | Survey instrument and scoring; Figures 2–3 (pp.2, 6–8) |
| Results | 16c | If relevant, consider translating estimates of relative risk into absolute risk for a meaningful time period. | Not applicable |
| Results | 17 | Report other analyses done—e.g., analyses of subgroups and interactions, and sensitivity analyses. | Post-hoc comparisons; Table 6 note (pp.10–12) |
| Discussion | 18 | Summarise key results with reference to study objectives. | Discussion (p.12) |
| Discussion | 19 | Discuss limitations of the study, taking into account sources of potential bias or imprecision. Discuss both direction and magnitude of any potential bias. | Strengths and limitations (p.13) |
| Discussion | 20 | Give a cautious overall interpretation of results considering objectives, limitations, multiplicity of analyses, results from similar studies, and other relevant evidence. | Discussion (pp.12–13) |
| Discussion | 21 | Discuss the generalisability (external validity) of the study results. | Strengths and limitations (p.13) |
| Other information | 22 | Give the source of funding and the role of the funders for the present study and, if applicable, for the original study on which the present article is based. | Funding statement (p.14) |

Note: Items marked 'Not applicable' reflect STROBE elements that do not apply to cross-sectional designs without matching or follow-up. Items marked 'Not reported' indicate information not currently stated explicitly in the manuscript and may be added if required by the journal.
